# Supplementary material for: Landscape Dynamics Improved Recreation Service of the Three Gorges Reservoir Area, China
Source: MDPI journal article supplement (doi:10.3390/ijerph18168356), 2021-08-06
Supplement: s1 [file s1]

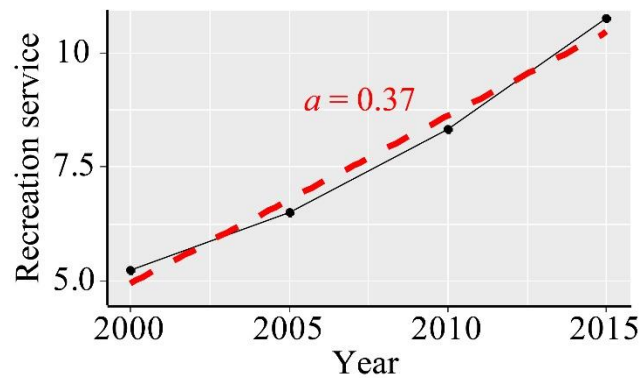

**Figure S1.** Linear trend analysis of the recreation service proxy of the TGRA. Note: In order to quantify the dynamic of recreation service, we used a least-square linear regression model to fit the recreation proxy. The changing trend is described by the modeled slope which is a in the figure. The black broken line is the estimated results, and the red dotted line is the trend line of the recreation.

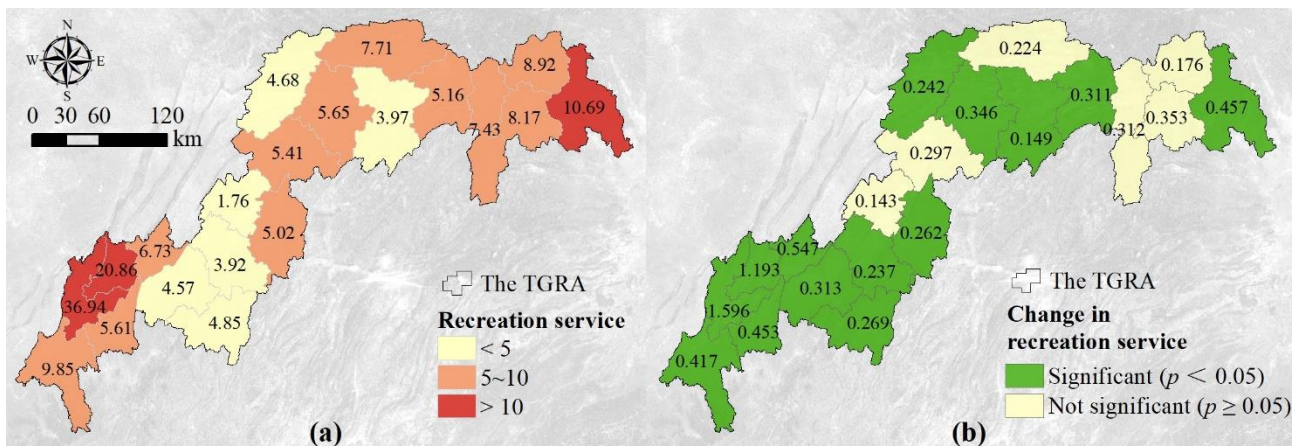

**Figure S2.** Average (a) and the modeled slope (b) of the recreation service proxy between 2000 and 2015 at the county scale.

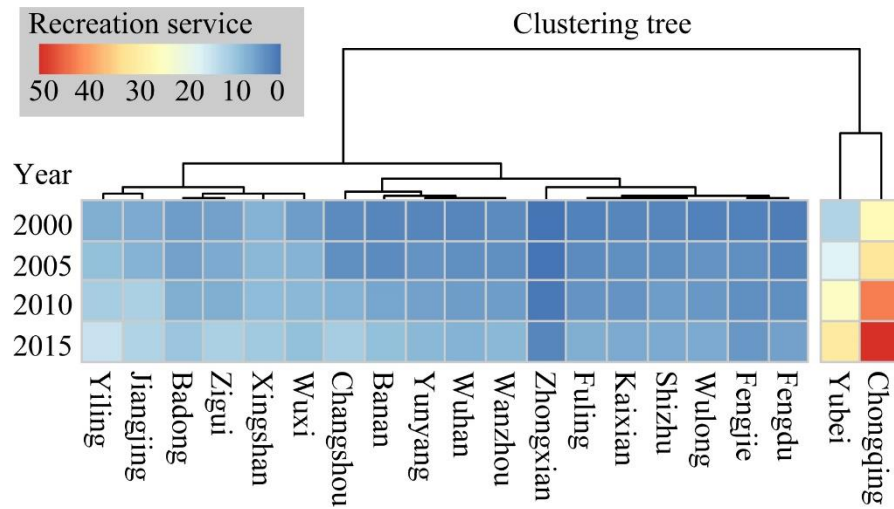

**Figure S3.** Heat map of the correlation matrix and hierarchical clustering for 20 counties in the TGRA according to the recreation service between 2000 and 2015.

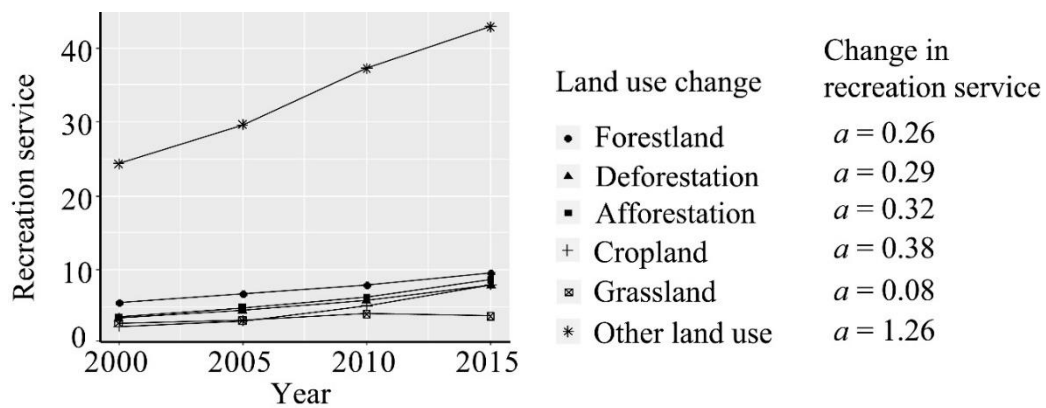

**Figure S4.** Temporal variations of the recreation service proxy for different land use change types of the TGRA. Note: We used a least-square linear regression model to fit the recreation. The changing trend is described by the modeled slope which is  $a$  in the figure.
